# Supplementary material for: In vivo and in vitro knockout system labelled using fluorescent protein via microhomology-mediated end joining
Source: Life Sci Alliance. 2019 Dec 24;3(1):e201900528. doi: 10.26508/lsa.201900528 (PMC6932181; doi:10.26508/lsa.201900528)
Supplement: Supplementary file 1 [file LSA-2019-00528_TableS1.xlsx]

## Sheet: Sheet1
Table S1. Oligonucleotide sequences
Oligonucleotide	Sequences (5' to 3')
ROSA26 sgRNA Fw	CACCgcgcccatcttctagaaagac
ROSA26 sgRNA Rev	AAACgtctttctagaagatgggcgc
CAT sgRNA1 Fw	CACCGCAGCCCATCGTGAGTGAGG
CAT sgRNA1 Rev	AAACCCTCACTCACGATGGGCTGC
CAT sgRNA2 Fw	CACCGCCGGGCACACGGCAAGAAGA
CAT sgRNA2 Rev	AAACTCTTCTTGCCGTGTGCCCGGC
Keap1 sgRNA1 Fw	CACCGGATGATCTGAACGTACGCT
Keap1 sgRNA1 Rev	AAACAGCGTACGTTCAGATCATCC
Keap1 sgRNA2 Fw	CACCGTTGATCAATTTGCTTCCGA
Keap1 sgRNA2 Rev	AAACTCGGAAGCAAATTGATCAAC
