# Supplementary material for: In vivo and in vitro knockout system labelled using fluorescent protein via microhomology-mediated end joining
Source: Life Sci Alliance. 2019 Dec 24;3(1):e201900528. doi: 10.26508/lsa.201900528 (PMC6932181; doi:10.26508/lsa.201900528)
Supplement: Supplementary file 2 [file LSA-2019-00528_TableS2.xlsx]

## Sheet: Sheet1
Table S2. Primer sequences
Primer	Sequences (5' to 3')			Applications
Brn3b gibson insert Fw	gcggcctctagactcgacCAGGCGCGGGAAGAGGGGACTATAACTCCACCGCCTCGATGAGCTGGGGCCCACCATGGCCCCAA			Construction
Brn3b gibson insert Rev	TTGGGGCCATGGTGGGCCCCAGCTCATCGAGGCGGTGGAGTTATAGTCCCCTCTTCCCGCGCCTGgtcgagtctagaggccgc			Construction
Brn3b inverse Rev	gtcgagtctagaggccgc			Construction
SV40 NLS inverse Fw	AAGCGGAACTACATCCTGGG			Construction
SV40 NLS inverse Rev	CATGGTGGAGCTCTGCTTAT			Construction
SV40 insert oligo Fw	ATAAGCAGAGCTCCACCATGGCCCCAAAGAAGAAGCGGAAGGTCAAGCGGAACTACATCCTGGG			Construction
SV40 insert oligo Rev	CCCAGGATGTAGTTCCGCTTGACCTTCCGCTTCTTCTTTGGGGCCATGGTGGAGCTCTGCTTAT			Construction
CMV gibson insert Fw	gcggcctctagactcgacGGTAGGCGTGTACGGTGGGAGGCCTATATAAGCAGAGCTCGTTTAGTGAACCGTCAGATCCCACCATGGCCCCAAAGA			Construction
CMV gibson insert Rev	TCTTTGGGGCCATGGTGGGATCTGACGGTTCACTAAACGAGCTCTGCTTATATAGGCCTCCCACCGTACACGCCTACCgtcgagtctagaggccgc			Construction
CMV inverse Fw	CCACCATGGCCCCAAAGA			Construction
NRPpA-SA Fw	gatccgAATAAAATACGAAATGTGACActgacctcttctcttcctcccacagg			Construction
NRPpA-SA Rev	gatccctgtgggaggaagagaagaggtcagTGTCACATTTCGTATTTTATTcg			Construction
sacas9-synpA oligo Fw	CCAGGCAAAAAAGAAAAAGtaaAATAAAAGATCTTTATTTTCATTAGATCTGTGTGTTGGTTTTTTGTGTGactccagtctttctagaaga			Construction
sacas9-synpA oligo Rev	tcttctagaaagactggagtCACACAAAAAACCAACACACAGATCTAATGAAAATAAAGATCTTTTATTttaCTTTTTCTTTTTTGCCTGG			Construction
sacas9-synpA inverse Fw	ACTCCAGTCTTTCTAGAAGATGGG			Construction
sacas9-synpA inverse Rev	CTTTTTCTTTTTTGCCTGG			Construction
pEiLOV PCR Fw	TGGAGGAGAATCCTGGGCCCATGATCGAGAAGAACTTCGT			Construction
pEiLOV PCR Rev	GTCACATTTCGTATTTTATTCACACGTGGTCGCTGCCGTC			Construction
pEiLOV inverse Fw	AATAAAATACGAAATGTGAC			Construction
pEiLOV inverse Rev	GGGCCCAGGATTCTCCTCCA			Construction
ilov synpa blunt oligo Fw	ATAAAAGATCTTTATTTTCATTAGATCTGTGTGTTGGTTTTTTGTGTGtttctagaagatgggcgggacgcccatcttctagaaagactggagt			Construction
ilov synpa blunt oligo Rev	actccagtctttctagaagatgggcgtcccgcccatcttctagaaaCACACAAAAAACCAACACACAGATCTAATGAAAATAAAGATCTTTTAT			Construction
ilov synpa inverse Fw	gagggcctatttcccatgattcctt			Construction
ilov synpa inverse Rev	TTCACACGTGGTCGCTGCCGTCCAG			Construction
Backbone Fw	tcgtcaacttgttggcgagattttt			Construction
Backbone Rev	CCGGGCACACGGCAAGAA			Construction
ROSA26 insert gibson Fw	ataaaatacgaaatgtgacaactccagtctttctagaagatgggcgcgtgatctgcaactccagtcctgacctcttctcttcctccca			Construction
ROSA26 insert gibson Rev	atcatgggaaataggccctcactccagtctttctagaagatgggcgtcccgcccatcttctagaaaTGTCACATTTCGTATTTTATTC			Construction
CAT insert gibson Fw	gcagcccatcgtgagtgaggaagaatactgcagcccatcgtgagtgctgacctcttctcttcctcc			Construction
CAT insert gibson Rev	ccgggcacacggcaagaagacaggatgggccgggcacacggcaagaCACACAAAAAACCAACACAC			Construction
CAT1 Fw	cgagatttttGAGGGCCTATTTCCCATG			Construction
CAT1 Rev	ctaggggttcctgcggccgcAAAAATCTCGCCAACAAGTTG			Construction
CAT2 Fw	ctgtcttcttgccgtgtgcccggGAGGGCCTATTTCCCATG			Construction
CAT2 Rev	ataggccctcAAAAATCTCGCCAACAAGTTG			Construction
