# Supplementary material for: In vivo and in vitro knockout system labelled using fluorescent protein via microhomology-mediated end joining
Source: Life Sci Alliance. 2019 Dec 24;3(1):e201900528. doi: 10.26508/lsa.201900528 (PMC6932181; doi:10.26508/lsa.201900528)
Supplement: Supplementary file 4 [file LSA-2019-00528_TableS4.xlsx]

## Sheet: Sheet1
Table S4. Primer sequences
Primer	Sequences (5' to 3')			Applications
ROSA sgRNA T7E1 fw	ccaaagtcgctctgagttgttatcagt			T7E1 assay, Genomic PCR
ROSA sgRNA T7E1 rv	ggagcgggagaaatggatatgaag			T7E1 assay, Genomic PCR
CAT sgRNA1 T7E1 fw	ttcctgcatatataggcccctga			T7E1 assay, Genomic PCR
CAT sgRNA1 T7E1 rv	agccagtagctccttttcaaaaa			T7E1 assay
CAT sgRNA2 T7E1 fw	tttgcgggtgactcataaacagg			T7E1 assay
CAT sgRNA2 T7E1 rv	ccagattgagagggtccgacaaa			T7E1 assay, Genomic PCR
