# Supplementary material for: In vivo and in vitro knockout system labelled using fluorescent protein via microhomology-mediated end joining
Source: Life Sci Alliance. 2019 Dec 24;3(1):e201900528. doi: 10.26508/lsa.201900528 (PMC6932181; doi:10.26508/lsa.201900528)
Supplement: Supplementary file 5 [file LSA-2019-00528_TableS5.xlsx]

## Sheet: Sheet1
Table S5. Primer sequences
Primer	Sequences (5' to 3')			Applications
iLOV Seq primer	TGCAGTACTTCATCGGCGTG			Genomic PCR
ROSA sgRNA Off1 fw	TCGTCGGCAGCGTCGGGAACAGCATGTGCAAAGG			Off-target analysis
ROSA sgRNA Off1 rv	GTCTCGTGGGCTCGGCCGGTCTCTTCCATACTCACG			Off-target analysis
ROSA sgRNA Off2 fw	TCGTCGGCAGCGTCGGCAACATTGTAACTATCTGTGGT			Off-target analysis
ROSA sgRNA Off2 rv	GTCTCGTGGGCTCGGAGTGCTCGATTTTAGTCTGAGCT			Off-target analysis
CAT sgRNA1 Off1 fw	TCGTCGGCAGCGTCTGAGCAACCTCAGGCAGAG			Off-target analysis
CAT sgRNA1 Off1 rv	GTCTCGTGGGCTCGGCCTGAAAAGCCAACGACACC			Off-target analysis
CAT sgRNA1 Off2 fw	TCGTCGGCAGCGTCTCTCAGCTGAGATCTGTCAACA			Off-target analysis
CAT sgRNA1 Off2 rv	GTCTCGTGGGCTCGGGGCTCTCACAGTCCCACAAA			Off-target analysis
CAT sgRNA2 Off1 fw	TCGTCGGCAGCGTCCCCTTGCCCTTTAATGCTGC			Off-target analysis
CAT sgRNA2 Off1 rv	GTCTCGTGGGCTCGGATCACATGGTGGGGCTTAGC			Off-target analysis
CAT sgRNA2 Off2 fw	TCGTCGGCAGCGTCCCTCGATCCCAGATTCTCACA			Off-target analysis
CAT sgRNA2 Off2 rv	GTCTCGTGGGCTCGGATATGAATCACCCCTGCCCC			Off-target analysis
Keap1 sgRNA1 Off1 fw	TCGTCGGCAGCGTCTGGCTTCCTGGCAGCTTTTA			Off-target analysis
Keap1 sgRNA1 Off1 rv	GTCTCGTGGGCTCGGAGGGCAAATATGGACAGAGTCA			Off-target analysis
Keap1 sgRNA1 Off2 fw	TCGTCGGCAGCGTCCGTTGCCTAACAATGCAGAGC			Off-target analysis
Keap1 sgRNA1 Off2 rv	GTCTCGTGGGCTCGGTGCTTTCCCGAGGAAGCATT			Off-target analysis
Keap1 sgRNA2 Off1 fw	TCGTCGGCAGCGTCCATGACATCTGCAGCATGGC			Off-target analysis
Keap1 sgRNA2 Off1 rv	GTCTCGTGGGCTCGGCTGTTGTCAGCGCTCAGGTA			Off-target analysis
Keap1 sgRNA2 Off2 fw	TCGTCGGCAGCGTCTGTCATCTGTGTTGCAAGTGA			Off-target analysis
Keap1 sgRNA2 Off2 rv	GTCTCGTGGGCTCGGGGATCACCTTTCCTGCTCCC			Off-target analysis
